# Supplementary material for: A Comprehensive Analysis of Hungarian MODY Patients—Part I: Gene Panel Sequencing Reveals Pathogenic Mutations in HNF1A, HNF1B, HNF4A, ABCC8 and INS Genes
Source: MDPI journal article supplement (doi:10.3390/life11080755), 2021-07-27
Supplement: s1 [file s1]

# Supplementary Materials for A Comprehensive Analysis of Hungarian MODY Patients–Part I: Gene Panel Sequencing Reveals Pathogenic Mutations in *HNF1A*, *HNF1B*, *HNF4A*, *ABCC8* and *INS* Genes

**Table S1.** The list of genes examined with the different library preparation kits.

|                                                                                |                                                                                                                                                                                                                                                                                                                                                                                                                                                                                                                                                                                               |
|--------------------------------------------------------------------------------|-----------------------------------------------------------------------------------------------------------------------------------------------------------------------------------------------------------------------------------------------------------------------------------------------------------------------------------------------------------------------------------------------------------------------------------------------------------------------------------------------------------------------------------------------------------------------------------------------|
| MODY MASTR kit<br>(Multiplicom, Niel, Belgium)                                 | 7 genes: <i>ABCC8</i> , <i>GCK</i> , <i>HNF1A</i> , <i>HNF1B</i> , <i>HNF4A</i> , <i>INS</i> , <i>KCNJ11</i>                                                                                                                                                                                                                                                                                                                                                                                                                                                                                  |
| custom DNA library preparation kit<br>(Qiagen, GmbH, Hilden, Germany)          | 17 genes: <i>ABCC8</i> , <i>GCK</i> , <i>HNF1A</i> , <i>HNF1B</i> , <i>HNF4A</i> , <i>INS</i> , <i>KCNJ11</i> , <i>SLC16A1</i> , <i>GLUD1</i> , <i>PDX1</i> , <i>INSR</i> , <i>KLF11</i> , <i>NEUROD1</i> , <i>APPL1</i> , <i>HADH</i> , <i>PAX4</i> , <i>BLK</i>                                                                                                                                                                                                                                                                                                                             |
| custom-designed gene panel<br>(Twist Bioscience, South San Francisco, CA, USA) | 18 genes: <i>ABCC8</i> , <i>GCK</i> , <i>HNF1A</i> , <i>HNF1B</i> , <i>HNF4A</i> , <i>INS</i> , <i>KCNJ11</i> , <i>SLC16A1</i> , <i>GLUD1</i> , <i>PDX1</i> , <i>INSR</i> , <i>KLF11</i> , <i>NEUROD1</i> , <i>APPL1</i> , <i>HADH</i> , <i>PAX4</i> , <i>BLK</i> , <i>RFX6</i><br>20 genes: <i>ABCC8</i> , <i>GCK</i> , <i>HNF1A</i> , <i>HNF1B</i> , <i>HNF4A</i> , <i>INS</i> , <i>KCNJ11</i> , <i>SLC16A1</i> , <i>GLUD1</i> , <i>PDX1</i> , <i>INSR</i> , <i>KLF11</i> , <i>NEUROD1</i> , <i>APPL1</i> , <i>HADH</i> , <i>PAX4</i> , <i>BLK</i> , <i>RFX6</i> , <i>CEL</i> , <i>WFS1</i> |

**Table S2.** Methods used for testing the index patients.

| Sample ID | Result   | Method                                      |
|-----------|----------|---------------------------------------------|
| P001      | Negative | Sanger: <i>HNF1A</i> ; Sanger: <i>HNF4A</i> |
| P002      | Positive | Sanger: <i>GCK</i>                          |
| P003      | Negative | Sanger: <i>HNF1A</i>                        |
| P004      | Negative | Sanger: <i>HNF1A</i>                        |
| P015      | Positive | Sanger: <i>GCK</i>                          |
| P020      | Positive | Sanger: <i>HNF1A</i>                        |
| P024      | Negative | Sanger: <i>HNF1A</i>                        |
| P025      | Negative | Sanger: <i>HNF1A</i>                        |
| P028      | Positive | Sanger: <i>GCK</i>                          |
| P032      | Positive | Sanger: <i>HNF1A</i>                        |
| P034      | Negative | Sanger: <i>HNF1A</i>                        |
| P035      | Negative | Sanger: <i>HNF1A</i>                        |
| P036      | Negative | Sanger: <i>HNF1A</i>                        |
| P037      | Positive | Sanger: <i>GCK</i>                          |
| P046      | Negative | Sanger: <i>HNF1A</i>                        |
| P047      | Positive | Sanger: <i>GCK</i>                          |
| P049      | Positive | Sanger: <i>HNF1A</i>                        |
| P056      | Negative | Sanger: <i>GCK</i>                          |
| P057      | Negative | Sanger: <i>GCK</i>                          |
| P058      | Positive | Sanger: <i>GCK</i> ; Sanger: <i>HNF1A</i>   |
| P062      | Negative | Sanger: <i>HNF1A</i>                        |
| P063      | Positive | Sanger: <i>GCK</i>                          |
| P064      | Positive | Sanger: <i>GCK</i>                          |
| P068      | Negative | Sanger: <i>GCK</i>                          |
| P069      | Positive | Sanger: <i>GCK</i>                          |
| P071      | Negative | Sanger: <i>GCK</i> ; Sanger: <i>HNF1A</i>   |
| P072      | Negative | Sanger: <i>HNF1A</i>                        |
| P073      | Negative | Sanger: <i>HNF1A</i>                        |

|      |          |                                                                           |
|------|----------|---------------------------------------------------------------------------|
| P074 | Positive | Sanger: <i>GCK</i> ; Sanger: <i>HNFB1A</i>                                |
| P076 | Negative | Sanger: <i>HNFB1A</i> ; Sanger: <i>HNFB4A</i>                             |
| P077 | Negative | Sanger: <i>GCK</i>                                                        |
| P078 | Positive | Sanger: <i>GCK</i>                                                        |
| P080 | Negative | Sanger: <i>HNFB1A</i>                                                     |
| P081 | Negative | Sanger: <i>HNFB1A</i>                                                     |
| P082 | Positive | Sanger: <i>GCK</i>                                                        |
| P085 | Positive | Sanger: <i>GCK</i>                                                        |
| P088 | Positive | Sanger: <i>GCK</i>                                                        |
| P089 | Positive | Sanger: <i>GCK</i>                                                        |
| P101 | Negative | Sanger: <i>GCK</i>                                                        |
| P104 | Positive | Sanger: <i>GCK</i>                                                        |
| P095 | Negative | NGS: TWIST (20 genes)                                                     |
| P099 | Negative | NGS: TWIST (20 genes)                                                     |
| P119 | Negative | Sanger: <i>GCK</i> ; Sanger: <i>HNFB1A</i>                                |
| P120 | Negative | Sanger: <i>GCK</i> ; Sanger: <i>HNFB1A</i>                                |
| P110 | Negative | NGS: TWIST (20 genes)                                                     |
| P112 | Negative | NGS: TWIST (20 genes)                                                     |
| P125 | Negative | Sanger: <i>HNFB1A</i>                                                     |
| P126 | Negative | Sanger: <i>GCK</i>                                                        |
| P127 | Negative | Sanger: <i>GCK</i>                                                        |
| P128 | Positive | Sanger: <i>GCK</i>                                                        |
| P131 | Negative | Sanger: <i>HNFB1A</i> ; Sanger: <i>HNFB4A</i>                             |
| P132 | Negative | Sanger: <i>HNFB1A</i>                                                     |
| P133 | Positive | Sanger: <i>GCK</i>                                                        |
| P140 | Negative | Sanger: <i>HNFB1A</i>                                                     |
| P141 | Positive | Sanger: <i>GCK</i>                                                        |
| P144 | Positive | NGS: Multiplicom (7 genes)                                                |
| P145 | Negative | Sanger: <i>GCK</i> ; Sanger: <i>HNFB1A</i>                                |
| P146 | Negative | Sanger: <i>GCK</i>                                                        |
| P147 | Negative | Sanger: <i>GCK</i>                                                        |
| P149 | Negative | MLPA                                                                      |
| P150 | Positive | MLPA                                                                      |
| P138 | Positive | NGS: TWIST (20 genes)                                                     |
| P154 | Negative | Sanger: <i>GCK</i>                                                        |
| P155 | Negative | Sanger: <i>HNFB1A</i>                                                     |
| P157 | Positive | Sanger: <i>GCK</i>                                                        |
| P159 | Negative | Sanger: <i>GCK</i>                                                        |
| P160 | Positive | Sanger: <i>GCK</i> ; Sanger: <i>HNFB1A</i>                                |
| P163 | Negative | NGS: Multiplicom (7 genes)                                                |
| P164 | Negative | Sanger: <i>HNFB1A</i> ; Sanger: <i>HNFB4A</i> ; MLPA                      |
| P166 | Negative | MLPA                                                                      |
| P168 | Positive | Sanger: <i>HNFB4A</i> ; MLPA                                              |
| P170 | Positive | Sanger: <i>GCK</i>                                                        |
| P171 | Negative | Sanger: <i>HNFB1A</i> ; Sanger: <i>HNFB4A</i> ; MLPA                      |
| P172 | Positive | Sanger: <i>GCK</i>                                                        |
| P174 | Positive | Sanger: <i>HNFB1A</i>                                                     |
| P177 | Positive | Sanger: <i>GCK</i> ; Sanger: <i>HNFB1A</i>                                |
| P178 | Positive | Sanger: <i>GCK</i> ; Sanger: <i>HNFB1A</i> ; Sanger: <i>HNFB4A</i> ; MLPA |

|      |          |                                                                                                 |
|------|----------|-------------------------------------------------------------------------------------------------|
| P186 | Positive | Sanger: <i>HNF1A</i>                                                                            |
| P191 | Negative | Sanger: <i>HNF1A</i>                                                                            |
| P192 | Positive | Sanger: <i>GCK</i>                                                                              |
| P195 | Negative | Sanger: <i>HNF1A</i> ; Sanger: <i>HNF4A</i> ; MLPA                                              |
| P196 | Positive | Sanger: <i>GCK</i> ; Sanger: <i>HNF1A</i>                                                       |
| P198 | Positive | Sanger: <i>HNF1A</i>                                                                            |
| P199 | Positive | Sanger: <i>GCK</i>                                                                              |
| P203 | Negative | Sanger: <i>GCK</i>                                                                              |
| P204 | Positive | Sanger: <i>GCK</i>                                                                              |
| P205 | Positive | Sanger: <i>GCK</i> ; Sanger: <i>HNF1A</i> ; Sanger: <i>HNF4A</i>                                |
| P207 | Negative | Sanger: <i>GCK</i>                                                                              |
| P208 | Negative | Sanger: <i>GCK</i>                                                                              |
| P209 | Negative | Sanger: <i>HNF1A</i> ; Sanger: <i>HNF4A</i> ; MLPA                                              |
| P210 | Positive | Sanger: <i>GCK</i>                                                                              |
| P213 | Negative | NGS: Qiagen (17 genes)                                                                          |
| P214 | Positive | Sanger: <i>GCK</i> ; Sanger: <i>HNF1A</i> ; Sanger: <i>HNF4A</i>                                |
| P216 | Negative | NGS: Junior                                                                                     |
| P218 | Negative | Sanger: <i>GCK</i> ; Sanger: <i>HNF1A</i>                                                       |
| P219 | Negative | Sanger: <i>GCK</i> ; Sanger: <i>HNF1A</i>                                                       |
| P220 | Negative | Sanger: <i>GCK</i> ; Sanger: <i>HNF1A</i>                                                       |
| P221 | Negative | NGS: Multiplicom (7 genes); MLPA                                                                |
| P222 | Positive | Sanger: <i>GCK</i>                                                                              |
| P224 | Negative | Sanger: <i>GCK</i> ; Sanger: <i>HNF1A</i> ; Sanger: <i>HNF4A</i> ; MLPA                         |
| P225 | Negative | Sanger: <i>GCK</i> ; Sanger: <i>HNF1A</i> ; Sanger: <i>HNF4A</i>                                |
| P227 | Positive | NGS: Multiplicom (7 genes); MLPA                                                                |
| P228 | Negative | Sanger: <i>GCK</i>                                                                              |
| P229 | Positive | Sanger: <i>HNF1A</i>                                                                            |
| P230 | Negative | NGS: Junior; MLPA                                                                               |
| P231 | Negative | Sanger: <i>HNF1A</i> ; Sanger: <i>HNF4A</i>                                                     |
| P232 | Positive | Sanger: <i>GCK</i>                                                                              |
| P236 | Positive | Sanger: <i>GCK</i>                                                                              |
| P243 | Negative | Sanger: <i>GCK</i> ; Sanger: <i>HNF1A</i> ; Sanger: <i>HNF4A</i> ; Sanger: <i>KCNJ11</i> ; MLPA |
| P244 | Negative | Sanger: <i>GCK</i> ; MLPA                                                                       |
| P245 | Negative | Sanger: <i>GCK</i>                                                                              |
| P246 | Negative | Sanger: <i>HNF1A</i> ; Sanger: <i>HNF4A</i>                                                     |
| P247 | Negative | NGS: Junior                                                                                     |
| P248 | Negative | Sanger: <i>GCK</i> ; Sanger: <i>HNF1A</i>                                                       |
| P249 | Negative | Sanger: <i>GCK</i>                                                                              |
| P250 | Positive | NGS: Junior                                                                                     |
| P254 | Negative | Sanger: <i>GCK</i> ; Sanger: <i>HNF1A</i> ; MLPA                                                |
| P255 | Negative | Sanger: <i>GCK</i> ; Sanger: <i>HNF1A</i>                                                       |
| P256 | Negative | NGS: Junior                                                                                     |
| P257 | Positive | NGS: Junior                                                                                     |
| P262 | Negative | NGS: Junior                                                                                     |
| P263 | Negative | NGS: Junior                                                                                     |
| P264 | Negative | NGS: Junior                                                                                     |
| P265 | Negative | NGS: Junior                                                                                     |
| P266 | Positive | NGS: Junior                                                                                     |
| P269 | Negative | NGS: Junior                                                                                     |

|      |          |                            |
|------|----------|----------------------------|
| P271 | Positive | NGS: Junior                |
| P272 | Negative | NGS: Junior                |
| P273 | Positive | NGS: Junior                |
| P274 | Negative | NGS: Junior                |
| P275 | Negative | NGS: Junior                |
| P276 | Negative | NGS: Junior                |
| P277 | Positive | NGS: Junior                |
| P278 | Negative | NGS: Junior                |
| P279 | Negative | NGS: Junior                |
| P280 | Positive | NGS: Junior                |
| P285 | Positive | NGS: Junior                |
| P287 | Negative | MLPA                       |
| P288 | Positive | NGS: Junior                |
| P289 | Negative | NGS: Junior                |
| P290 | Positive | NGS: Junior                |
| P294 | Negative | NGS: Junior; MLPA          |
| P295 | Negative | NGS: Junior                |
| P296 | Negative | NGS: Junior                |
| P297 | Positive | NGS: Junior; MLPA          |
| P298 | Positive | Sanger: GCK                |
| P300 | Negative | NGS: Junior                |
| P301 | Negative | NGS: Junior; MLPA          |
| P316 | Negative | NGS: Junior                |
| P317 | Negative | NGS: Multiplicom (7 genes) |
| P318 | Negative | NGS: Multiplicom (7 genes) |
| P319 | Positive | NGS: Multiplicom (7 genes) |
| P320 | Negative | NGS: Multiplicom (7 genes) |
| P321 | Negative | NGS: Qiagen (17 genes)     |
| P322 | Negative | NGS: Multiplicom (7 genes) |
| P323 | Positive | NGS: Multiplicom (7 genes) |
| P324 | Positive | NGS: Multiplicom (7 genes) |
| P325 | Negative | NGS: Qiagen (17 genes)     |
| P329 | Negative | NGS: Multiplicom (7 genes) |
| P330 | Negative | NGS: Multiplicom (7 genes) |
| P331 | Positive | NGS: Multiplicom (7 genes) |
| P335 | Positive | NGS: Multiplicom (7 genes) |
| P336 | Negative | NGS: Multiplicom (7 genes) |
| P337 | Negative | NGS: Multiplicom (7 genes) |
| P338 | Positive | NGS: Multiplicom (7 genes) |
| P340 | Positive | NGS: Multiplicom (7 genes) |
| P343 | Positive | NGS: Multiplicom (7 genes) |
| P345 | Negative | NGS: Multiplicom (7 genes) |
| P346 | Positive | NGS: Multiplicom (7 genes) |
| P349 | Positive | NGS: Multiplicom (7 genes) |
| P350 | Negative | NGS: Multiplicom (7 genes) |
| P351 | Negative | NGS: Multiplicom (7 genes) |
| P352 | Negative | NGS: Multiplicom (7 genes) |
| P353 | Positive | NGS: Multiplicom (7 genes) |
| P354 | Negative | NGS: Multiplicom (7 genes) |

|      |          |                                  |
|------|----------|----------------------------------|
| P355 | Negative | NGS: Multiplicom (7 genes)       |
| P356 | Negative | NGS: Multiplicom (7 genes)       |
| P357 | Positive | NGS: Multiplicom (7 genes)       |
| P359 | Negative | NGS: Multiplicom (7 genes)       |
| P360 | Negative | NGS: Multiplicom (7 genes)       |
| P361 | Positive | NGS: Multiplicom (7 genes)       |
| P362 | Negative | NGS: Multiplicom (7 genes)       |
| P363 | Negative | NGS: Multiplicom (7 genes); MLPA |
| P364 | Positive | NGS: Multiplicom (7 genes)       |
| P366 | Negative | NGS: Multiplicom (7 genes)       |
| P367 | Negative | NGS: Qiagen (17 genes)           |
| P368 | Negative | NGS: Multiplicom (7 genes)       |
| P371 | Negative | NGS: Multiplicom (7 genes)       |
| P372 | Negative | NGS: Multiplicom (7 genes)       |
| P373 | Positive | NGS: Multiplicom (7 genes)       |
| P378 | Positive | NGS: Multiplicom (7 genes)       |
| P379 | Negative | NGS: Multiplicom (7 genes)       |
| P380 | Negative | NGS: Multiplicom (7 genes)       |
| P381 | Negative | NGS: Multiplicom (7 genes)       |
| P382 | Negative | NGS: Multiplicom (7 genes)       |
| P384 | Positive | NGS: Multiplicom (7 genes)       |
| P387 | Negative | NGS: Multiplicom (7 genes)       |
| P388 | Negative | NGS: Multiplicom (7 genes)       |
| P389 | Negative | NGS: TWIST (18 genes); MLPA      |
| P390 | Negative | NGS: Multiplicom (7 genes)       |
| P391 | Negative | NGS: Multiplicom (7 genes)       |
| P394 | Positive | NGS: Multiplicom (7 genes)       |
| P395 | Negative | NGS: Multiplicom (7 genes)       |
| P396 | Positive | NGS: Multiplicom (7 genes)       |
| P401 | Negative | NGS: Multiplicom (7 genes)       |
| P403 | Positive | NGS: Multiplicom (7 genes)       |
| P404 | Negative | NGS: Multiplicom (7 genes)       |
| P405 | Negative | NGS: Multiplicom (7 genes)       |
| P406 | Negative | NGS: Multiplicom (7 genes)       |
| P413 | Negative | NGS: Multiplicom (7 genes); MLPA |
| P414 | Negative | NGS: Multiplicom (7 genes)       |
| P418 | Positive | NGS: Multiplicom (7 genes)       |
| P425 | Negative | NGS: Multiplicom (7 genes)       |
| P426 | Positive | NGS: Multiplicom (7 genes)       |
| P427 | Negative | NGS: Multiplicom (7 genes)       |
| P428 | Negative | NGS: Multiplicom (7 genes)       |
| P429 | Negative | NGS: Multiplicom (7 genes)       |
| P430 | Negative | NGS: Multiplicom (7 genes)       |
| P431 | Negative | NGS: Multiplicom (7 genes); MLPA |
| P432 | Negative | NGS: Multiplicom (7 genes)       |
| P433 | Negative | NGS: Qiagen (17 genes)           |
| P434 | Negative | NGS: Qiagen (17 genes)           |
| P435 | Positive | NGS: Qiagen (17 genes)           |
| P436 | Positive | NGS: Qiagen (17 genes); MLPA     |

|      |          |                              |
|------|----------|------------------------------|
| P437 | Positive | NGS: Qiagen (17 genes)       |
| P439 | Positive | NGS: Qiagen (17 genes)       |
| P440 | Negative | NGS: Qiagen (17 genes)       |
| P441 | Negative | NGS: Qiagen (17 genes)       |
| P442 | Negative | NGS: Qiagen (17 genes)       |
| P443 | Negative | NGS: Qiagen (17 genes)       |
| P444 | Positive | NGS: Qiagen (17 genes)       |
| P445 | Negative | NGS: Qiagen (17 genes)       |
| P446 | Negative | NGS: Qiagen (17 genes)       |
| P447 | Positive | NGS: Qiagen (17 genes)       |
| P448 | Positive | NGS: Qiagen (17 genes)       |
| P449 | Negative | NGS: Qiagen (17 genes)       |
| P450 | Negative | NGS: Qiagen (17 genes)       |
| P451 | Positive | NGS: Qiagen (17 genes)       |
| P452 | Negative | NGS: Qiagen (17 genes)       |
| P453 | Negative | NGS: Qiagen (17 genes)       |
| P454 | Negative | NGS: Qiagen (17 genes)       |
| P455 | Positive | NGS: Qiagen (17 genes)       |
| P456 | Negative | NGS: Qiagen (17 genes)       |
| P457 | Negative | NGS: Qiagen (17 genes)       |
| P458 | Negative | NGS: Qiagen (17 genes)       |
| P459 | Negative | NGS: Qiagen (17 genes)       |
| P460 | Positive | NGS: Qiagen (17 genes)       |
| P461 | Positive | NGS: Qiagen (17 genes)       |
| P462 | Negative | NGS: Qiagen (17 genes)       |
| P463 | Negative | NGS: Qiagen (17 genes)       |
| P464 | Negative | NGS: Qiagen (17 genes)       |
| P465 | Negative | NGS: Qiagen (17 genes)       |
| P466 | Positive | NGS: Qiagen (17 genes)       |
| P467 | Negative | NGS: Qiagen (17 genes)       |
| P468 | Negative | NGS: Qiagen (17 genes); MLPA |
| P469 | Positive | NGS: Qiagen (17 genes)       |
| P470 | Positive | NGS: Qiagen (17 genes)       |
| P471 | Negative | NGS: Qiagen (17 genes)       |
| P472 | Negative | NGS: Qiagen (17 genes)       |
| P473 | Negative | NGS: Qiagen (17 genes)       |
| P477 | Positive | NGS: Qiagen (17 genes); MLPA |
| P479 | Negative | NGS: Qiagen (17 genes)       |
| P480 | Negative | NGS: Qiagen (17 genes)       |
| P481 | Negative | NGS: Qiagen (17 genes); MLPA |
| P482 | Positive | NGS: Qiagen (17 genes)       |
| P483 | Positive | NGS: Qiagen (17 genes)       |
| P488 | Positive | NGS: Qiagen (17 genes)       |
| P489 | Negative | NGS: Qiagen (17 genes)       |
| P491 | Negative | NGS: Qiagen (17 genes)       |
| P492 | Negative | NGS: Qiagen (17 genes)       |
| P493 | Negative | NGS: Qiagen (17 genes)       |
| P494 | Negative | NGS: Qiagen (17 genes)       |
| P495 | Negative | NGS: Qiagen (17 genes)       |

|      |          |                              |
|------|----------|------------------------------|
| P496 | Negative | NGS: Qiagen (17 genes)       |
| P497 | Negative | NGS: Qiagen (17 genes)       |
| P498 | Negative | NGS: Qiagen (17 genes)       |
| P499 | Negative | NGS: Qiagen (17 genes)       |
| P500 | Negative | NGS: Qiagen (17 genes)       |
| P507 | Negative | NGS: Qiagen (17 genes)       |
| P508 | Negative | NGS: Qiagen (17 genes)       |
| P510 | Negative | NGS: Qiagen (17 genes)       |
| P511 | Negative | NGS: Qiagen (17 genes)       |
| P512 | Positive | NGS: Qiagen (17 genes)       |
| P515 | Negative | NGS: Qiagen (17 genes)       |
| P516 | Negative | NGS: Qiagen (17 genes)       |
| P517 | Negative | NGS: Qiagen (17 genes)       |
| P518 | Negative | NGS: Qiagen (17 genes)       |
| P519 | Negative | NGS: Qiagen (17 genes)       |
| P520 | Negative | NGS: Qiagen (17 genes)       |
| P521 | Negative | NGS: Qiagen (17 genes)       |
| P522 | Negative | NGS: Qiagen (17 genes)       |
| P523 | Negative | NGS: Qiagen (17 genes); MLPA |
| P524 | Negative | NGS: Qiagen (17 genes)       |
| P528 | Negative | NGS: Qiagen (17 genes)       |
| P529 | Negative | NGS: Qiagen (17 genes)       |
| P530 | Negative | NGS: Qiagen (17 genes)       |
| P532 | Positive | NGS: Multiplicom (7 genes)   |
| P533 | Negative | NGS: Qiagen (17 genes)       |
| P534 | Negative | NGS: Qiagen (17 genes)       |
| P535 | Negative | NGS: Qiagen (17 genes)       |
| P536 | Positive | NGS: Qiagen (17 genes); MLPA |
| P537 | Negative | NGS: Qiagen (17 genes)       |
| P538 | Negative | NGS: Qiagen (17 genes)       |
| P539 | Negative | NGS: Qiagen (17 genes)       |
| P540 | Negative | NGS: Qiagen (17 genes)       |
| P541 | Negative | NGS: Qiagen (17 genes)       |
| P542 | Negative | NGS: Qiagen (17 genes)       |
| P544 | Negative | NGS: Qiagen (17 genes)       |
| P545 | Positive | NGS: Qiagen (17 genes)       |
| P546 | Negative | NGS: Qiagen (17 genes)       |
| P547 | Negative | NGS: Qiagen (17 genes)       |
| P548 | Negative | NGS: Qiagen (17 genes)       |
| P549 | Negative | NGS: Qiagen (17 genes)       |
| P550 | Positive | NGS: Qiagen (17 genes)       |
| P551 | Negative | NGS: Qiagen (17 genes)       |
| P552 | Negative | NGS: Qiagen (17 genes)       |
| P553 | Negative | NGS: Qiagen (17 genes)       |
| P554 | Negative | NGS: Qiagen (17 genes)       |
| P555 | Negative | NGS: Qiagen (17 genes)       |
| P556 | Positive | NGS: Qiagen (17 genes); MLPA |
| P557 | Positive | NGS: Qiagen (17 genes)       |
| P558 | Positive | NGS: Qiagen (17 genes)       |

|      |          |                              |
|------|----------|------------------------------|
| P559 | Positive | NGS: Qiagen (17 genes)       |
| P564 | Negative | NGS: Qiagen (17 genes)       |
| P565 | Negative | NGS: Qiagen (17 genes)       |
| P566 | Negative | NGS: Qiagen (17 genes)       |
| P567 | Positive | NGS: Qiagen (17 genes)       |
| P570 | Positive | NGS: Qiagen (17 genes)       |
| P574 | Positive | NGS: Qiagen (17 genes)       |
| P579 | Negative | NGS: Qiagen (17 genes)       |
| P581 | Negative | NGS: Qiagen (17 genes)       |
| P582 | Negative | NGS: Qiagen (17 genes)       |
| P583 | Negative | NGS: Qiagen (17 genes)       |
| P584 | Negative | NGS: Qiagen (17 genes)       |
| P585 | Positive | NGS: Qiagen (17 genes); MLPA |
| P586 | Positive | NGS: Qiagen (17 genes)       |
| P587 | Negative | NGS: Qiagen (17 genes)       |
| P588 | Negative | NGS: Qiagen (17 genes)       |
| P589 | Negative | NGS: Qiagen (17 genes)       |
| P590 | Negative | NGS: Qiagen (17 genes)       |
| P591 | Positive | NGS: Qiagen (17 genes)       |
| P592 | Negative | NGS: Qiagen (17 genes)       |
| P593 | Negative | NGS: Qiagen (17 genes)       |
| P594 | Negative | NGS: Qiagen (17 genes)       |
| P596 | Negative | NGS: Qiagen (17 genes)       |
| P597 | Negative | NGS: Qiagen (17 genes)       |
| P598 | Positive | NGS: Qiagen (17 genes)       |
| P599 | Negative | NGS: Qiagen (17 genes)       |
| P600 | Negative | NGS: Qiagen (17 genes)       |
| P601 | Positive | NGS: Qiagen (17 genes)       |
| P606 | Negative | NGS: Qiagen (17 genes)       |
| P607 | Negative | NGS: Qiagen (17 genes)       |
| P608 | Negative | NGS: Qiagen (17 genes)       |
| P609 | Negative | NGS: Qiagen (17 genes)       |
| P610 | Positive | NGS: Qiagen (17 genes)       |
| P612 | Negative | NGS: Qiagen (17 genes)       |
| P614 | Positive | NGS: Qiagen (17 genes)       |
| P618 | Negative | NGS: Qiagen (17 genes)       |
| P619 | Negative | NGS: Qiagen (17 genes)       |
| P620 | Negative | NGS: Qiagen (17 genes)       |
| P621 | Negative | NGS: Qiagen (17 genes)       |
| P622 | Negative | NGS: Qiagen (17 genes)       |
| P623 | Negative | NGS: Qiagen (17 genes)       |
| P624 | Negative | NGS: Qiagen (17 genes)       |
| P625 | Negative | NGS: Qiagen (17 genes)       |
| P627 | Negative | NGS: Qiagen (17 genes)       |
| P628 | Negative | NGS: Qiagen (17 genes)       |
| P629 | Positive | NGS: Qiagen (17 genes)       |
| P630 | Negative | NGS: Qiagen (17 genes)       |
| P631 | Negative | NGS: Qiagen (17 genes)       |
| P632 | Negative | NGS: Qiagen (17 genes)       |



|      |          |                        |
|------|----------|------------------------|
| P633 | Negative | NGS: Qiagen (17 genes) |
| P634 | Negative | NGS: Qiagen (17 genes) |
| P635 | Negative | NGS: Qiagen (17 genes) |
| P636 | Positive | NGS: Qiagen (17 genes) |
| P637 | Negative | NGS: Qiagen (17 genes) |
| P638 | Negative | NGS: Qiagen (17 genes) |
| P639 | Positive | NGS: Qiagen (17 genes) |
| P640 | Positive | NGS: Qiagen (17 genes) |
| P641 | Positive | NGS: Qiagen (17 genes) |
| P643 | Negative | NGS: TWIST (18 genes)  |
| P644 | Negative | NGS: TWIST (18 genes)  |
| P647 | Negative | NGS: TWIST (18 genes)  |
| P648 | Negative | NGS: TWIST (18 genes)  |
| P649 | Negative | NGS: TWIST (18 genes)  |
| P650 | Negative | NGS: TWIST (18 genes)  |
| P651 | Negative | NGS: TWIST (18 genes)  |
| P652 | Negative | NGS: TWIST (18 genes)  |
| P656 | Negative | NGS: TWIST (18 genes)  |
| P657 | Negative | NGS: TWIST (18 genes)  |
| P658 | Negative | NGS: TWIST (18 genes)  |
| P659 | Negative | NGS: TWIST (18 genes)  |
| P660 | Negative | NGS: TWIST (18 genes)  |
| P661 | Negative | NGS: TWIST (18 genes)  |
| P662 | Negative | NGS: TWIST (18 genes)  |
| P663 | Positive | NGS: TWIST (18 genes)  |
| P664 | Negative | NGS: TWIST (18 genes)  |
| P665 | Positive | NGS: TWIST (18 genes)  |
| P666 | Positive | NGS: TWIST (18 genes)  |
| P669 | Negative | NGS: TWIST (18 genes)  |
| P670 | Negative | NGS: TWIST (18 genes)  |
| P671 | Negative | NGS: TWIST (18 genes)  |
| P672 | Negative | NGS: TWIST (18 genes)  |
| P673 | Negative | NGS: TWIST (18 genes)  |
| P674 | Negative | NGS: TWIST (18 genes)  |
| P675 | Positive | NGS: TWIST (18 genes)  |
| P676 | Negative | NGS: TWIST (18 genes)  |
| P677 | Negative | NGS: TWIST (18 genes)  |
| P678 | Negative | NGS: TWIST (18 genes)  |
| P679 | Negative | NGS: TWIST (20 genes)  |
| P680 | Negative | NGS: TWIST (18 genes)  |
| P681 | Negative | NGS: TWIST (18 genes)  |
| P682 | Negative | NGS: TWIST (18 genes)  |
| P683 | Negative | NGS: TWIST (18 genes)  |
| P684 | Positive | NGS: TWIST (18 genes)  |
| P685 | Negative | NGS: TWIST (18 genes)  |
| P686 | Positive | NGS: TWIST (18 genes)  |
| P689 | Negative | NGS: TWIST (18 genes)  |
| P690 | Negative | NGS: TWIST (18 genes)  |
| P691 | Negative | NGS: TWIST (18 genes)  |

---

|      |          |                        |
|------|----------|------------------------|
| P692 | Negative | NGS: TWIST (18 genes)  |
| P693 | Negative | NGS: TWIST (18 genes)  |
| P694 | Negative | NGS: TWIST (18 genes)  |
| P695 | Negative | NGS: TWIST (18 genes)  |
| P696 | Positive | NGS: TWIST (18 genes)  |
| P697 | Negative | NGS: TWIST (18 genes)  |
| P698 | Negative | NGS: TWIST (18 genes)  |
| P699 | Negative | NGS: TWIST (18 genes)  |
| P700 | Negative | NGS: TWIST (18 genes)  |
| P701 | Negative | NGS: TWIST (18 genes)  |
| P702 | Negative | NGS: TWIST (18 genes)  |
| P703 | Negative | NGS: TWIST (18 genes)  |
| P704 | Negative | NGS: TWIST (18 genes)  |
| P706 | Negative | NGS: TWIST (18 genes)  |
| P707 | Negative | NGS: TWIST (18 genes)  |
| P708 | Negative | NGS: TWIST (18 genes)  |
| P709 | Negative | NGS: TWIST (18 genes)  |
| P710 | Negative | NGS: TWIST (18 genes)  |
| P711 | Negative | NGS: TWIST (18 genes)  |
| P712 | Negative | NGS: TWIST (18 genes)  |
| P713 | Positive | NGS: TWIST (18 genes)  |
| P715 | Negative | NGS: TWIST (18 genes)  |
| P717 | Negative | NGS: TWIST (18 genes)  |
| P718 | Negative | NGS: Qiagen (17 genes) |
| P719 | Negative | NGS: TWIST (18 genes)  |
| P720 | Negative | NGS: TWIST (18 genes)  |
| P721 | Negative | NGS: TWIST (18 genes)  |
| P722 | Positive | NGS: TWIST (18 genes)  |
| P724 | Negative | NGS: TWIST (18 genes)  |
| P725 | Negative | NGS: TWIST (18 genes)  |

---

Table S3. Clinical data of patients with *HNF1A* mutation.

| Family ID | Sample ID | Age at Diagnosis of Diabetes | Age at Receiving Genetic dg | BMI* | Obesity | Complications            | Therapy BEFORE Genetic Diagnosis | FPG (0') (mmol/L) | PPG (120') (mmol/L) | HbA1c % (mmol/mol) | MODY Calculator (%) | Family Screening              |
|-----------|-----------|------------------------------|-----------------------------|------|---------|--------------------------|----------------------------------|-------------------|---------------------|--------------------|---------------------|-------------------------------|
| F007      | P020      | 11                           | 29                          | 22.3 | no      | N/A                      | insulin                          | N/A               | N/A                 | 7.8 (61.7)         | 75.5                | multiple generations affected |
| F007      | P021      | no diabetes                  | 28                          | N/A  | N/A     | N/A                      | N/A                              | N/A               | N/A                 | N/A                | N/A                 | multiple generations affected |
| F007      | P022      | no diabetes                  | 4                           | N/A  | N/A     | N/A                      | N/A                              | N/A               | N/A                 | N/A                | N/A                 | multiple generations affected |
| F007      | P023      | no diabetes                  | 1                           | 17   | no      | none                     | none                             | N/A               | N/A                 | N/A                | N/A                 | multiple generations affected |
| F012      | P032      | N/A                          | 35                          | 25   | no      | retinopathy, IHD         | insulin                          | 8.6               | 12                  | 13.4 (123.0)       | N/A                 | multiple generations affected |
| F012      | P033      | no diabetes                  | 7                           | N/A  | N/A     | N/A                      | N/A                              | N/A               | N/A                 | N/A                | N/A                 | multiple generations affected |
| F020      | P049      | 25                           | 47                          | 25.4 | no      | none                     | insulin                          | 7.9               | 9.9                 | 8.2 (66.1)         | 45.5                | multiple generations affected |
| F020      | P050      | 19                           | 24                          | 27.8 | no      | none                     | OAD - metformin                  | 6.8               | 9.1                 | 6.2 (43.3)         | 75.5                | multiple generations affected |
| F020      | P051      | 39                           | 69                          | 32.4 | yes     | retinopathy              | OAD - metformin + insulin        | 7.7               | 9.8                 | 7.5 (58.5)         | N/A                 | multiple generations affected |
| F020      | P053      | no diabetes                  | 24                          | 24.5 | no      | none                     | N/A                              | N/A               | N/A                 | N/A                | N/A                 | multiple generations affected |
| F025      | P058      | 11                           | 37                          | 23   | no      | proteinuria, retinopathy | insulin                          | N/A               | N/A                 | N/A                | N/A                 | multiple generations affected |
| F025      | P059      | 13                           | 16                          | 27.6 | yes     | none                     | insulin                          | 6.0               | N/A                 | 7.0 (53.0)         | 8.2                 | multiple generations affected |
| F095      | P174      | 15                           | 44                          | 26   | no      | none                     | insulin                          | N/A               | N/A                 | 7.1 (54.1)         | 6.4                 | multiple generations affected |
| F095      | P175      | no diabetes                  | 27                          | N/A  | N/A     | N/A                      | N/A                              | N/A               | N/A                 | N/A                | N/A                 | multiple generations affected |
| F095      | P176      | no diabetes                  | 24                          | N/A  | N/A     | N/A                      | N/A                              | N/A               | N/A                 | N/A                | N/A                 | multiple generations affected |
| F096      | P177      | 12                           | 12                          | 16.9 | no      | none                     | insulin                          | 14.8              | N/A                 | N/A                | N/A                 | no family members tested      |
| F098      | P186      | 12                           | 12                          | 19.4 | no      | none                     | insulin                          | 6.7               | 13.6                | 6.3 (45.4)         | 49.4                | multiple generations affected |
| F098      | P189      | 30                           | 54                          | 22.5 | no      | none                     | insulin                          | 11.3              | N/A                 | 7.4 (57.4)         | 4.6                 | multiple generations affected |

| Family ID | Sample ID | Age at Diagnosis of Diabetes | Age at Receiving Genetic dg | BMI* | Obesity | Complications        | Therapy BEFORE Genetic Diagnosis | FPG (0') (mmol/L) | PPG (120') (mmol/L) | HbA1c % (mmol/mol) | MODY Calculator (%) | Family Screening              |
|-----------|-----------|------------------------------|-----------------------------|------|---------|----------------------|----------------------------------|-------------------|---------------------|--------------------|---------------------|-------------------------------|
| F104      | P198      | 32                           | 32                          | 20.6 | no      | none                 | diet                             | 7.81              | 11.86               | 6.2 (44.3)         | 75.5                | no family members tested      |
| F128      | P229      | 13                           | 17                          | 24.1 | no      | none                 | insulin                          | 8.8               | N/A                 | 8.7 (71.6)         | 1.9                 | no family members tested      |
| F141      | P250      | 33                           | 37                          | N/A  | N/A     | N/A                  | diet                             | N/A               | N/A                 | 8.5 (69.4)         | N/A                 | multiple generations affected |
| F141      | P252      | 16                           | 39                          | N/A  | N/A     | N/A                  | OAD – sulphonylurea              | N/A               | N/A                 | N/A                | N/A                 | multiple generations affected |
| F141      | P253      | 42                           | 79                          | N/A  | N/A     | N/A                  | OAD                              | N/A               | N/A                 | N/A                | N/A                 | multiple generations affected |
| F155      | P273      | 14                           | 17                          | 27.5 | no      | none                 | insulin                          | N/A               | N/A                 | 7.0 (53.0)         | 1.9                 | no family members tested      |
| F159      | P277      | 36                           | 44                          | 24.5 | no      | none                 | OAD – sulphonylurea              | 8.2               | 13.5                | 8.1 (65.0)         | N/A                 | no family members tested      |
| F204      | P346      | N/A                          | 42                          | N/A  | N/A     | N/A                  | N/A                              | N/A               | N/A                 | N/A                | N/A                 | parents not tested            |
| F228      | P378      | 13                           | 15                          | N/A  | N/A     | none                 | insulin                          | 10.9              | N/A                 | 7.8 (61.7)         | N/A                 | no family members tested      |
| F234      | P384      | 35                           | 50                          | 36.1 | yes     | none                 | OAD - metformin + sulphonylurea  | 7.0               | N/A                 | 7.1 (54.1)         | 4.6                 | no family members tested      |
| F259      | P418      | 13                           | 13                          | 23.6 | no      | N/A                  | N/A                              | 6.1               | 15.9                | 6.5 (47.5)         | N/A                 | multiple generations affected |
| F259      | P422      | 4                            | 41                          | N/A  | N/A     | none                 | insulin                          | N/A               | N/A                 | 12.0 (107.7)       | N/A                 | multiple generations affected |
| F283      | P447      | N/A                          | 13                          | N/A  | N/A     | N/A                  | N/A                              | N/A               | N/A                 | N/A                | N/A                 | no family members tested      |
| F287      | P451      | N/A                          | 31                          | N/A  | N/A     | N/A                  | N/A                              | N/A               | N/A                 | N/A                | N/A                 | no family members tested      |
| F297      | P461      | 12                           | 17                          | 31   | yes     | none                 | insulin                          | 15.2              | N/A                 | 10.6 (92.4)        | 6.4                 | no family members tested      |
| F302      | P466      | 15                           | 28                          | 20.7 | no      | none                 | insulin                          | 7.0               | 14.9                | 6.0 (42.1)         | 49.4                | no family members tested      |
| F333      | P512      | 17                           | 19                          | 25.3 | no      | none                 | diet                             | 4.6               | 8.9                 | 5.2 (33.3)         | 75.5                | multiple generations affected |
| F333      | P514      | 45                           | 47                          | 30.8 | yes     | acanthosis nigricans | OAD - metformin                  | 10.2              | N/A                 | 6.9 (51.9)         | N/A                 | multiple generations affected |
| F361      | P545      | 23                           | 37                          | 22.2 | no      | none                 | insulin                          | 4.4               | 14.8                | 5.8 (39.9)         | 75.5                | parents not tested            |
| F366      | P550      | 15                           | 26                          | 20.3 | no      | none                 | OAD – sulphonylurea              | 4.2               | N/A                 | 5.7 (38.8)         | 75.5                | no family members tested      |

| Family ID   | Sample ID   | Age at Diagnosis of Diabetes | Age at Receiving Genetic dg | BMI*         | Obesity    | Complications      | Therapy BEFORE Genetic Diagnosis | FPG (0') (mmol/L) | PPG (120') (mmol/L) | HbA1c % (mmol/mol) | MODY Calculator (%) | Family Screening                     |
|-------------|-------------|------------------------------|-----------------------------|--------------|------------|--------------------|----------------------------------|-------------------|---------------------|--------------------|---------------------|--------------------------------------|
| <b>F380</b> | <b>P567</b> | <b>17</b>                    | <b>20</b>                   | <b>24</b>    | <b>no</b>  | <b>N/A</b>         | <b>insulin</b>                   | <b>N/A</b>        | <b>N/A</b>          | <b>5.4 (35.5)</b>  | <b>49.4</b>         | <b>multiple generations affected</b> |
| F380        | P569        | 27                           | 56                          | 24           | no         | N/A                | insulin                          | N/A               | N/A                 | 7.2 (55.2)         | 35.8                | multiple generations affected        |
| <b>F394</b> | <b>P591</b> | <b>13</b>                    | <b>32</b>                   | <b>19.7</b>  | <b>no</b>  | <b>retinopathy</b> | <b>OAD – sulphonylurea</b>       | <b>6.71</b>       | <b>N/A</b>          | <b>N/A</b>         | <b>N/A</b>          | <b>no family members tested</b>      |
| <b>F423</b> | <b>P629</b> | <b>N/A</b>                   | <b>16</b>                   | <b>N/A</b>   | <b>N/A</b> | <b>N/A</b>         | <b>OAD - metformin</b>           | <b>N/A</b>        | <b>N/A</b>          | <b>N/A</b>         | <b>N/A</b>          | <b>parents not tested</b>            |
| F423        | P726        | no diabetes                  | 14                          | N/A          | N/A        | N/A                | N/A                              | N/A               | N/A                 | N/A                | N/A                 | parents not tested                   |
| <b>F430</b> | <b>P636</b> | <b>10</b>                    | <b>10</b>                   | <b>12.9</b>  | <b>no</b>  | <b>N/A</b>         | <b>diet</b>                      | <b>6.5</b>        | <b>15.5</b>         | <b>5.3 (34.4)</b>  | <b>75.5</b>         | <b>no family members tested</b>      |
| <b>F452</b> | <b>P663</b> | <b>16</b>                    | <b>18</b>                   | <b>25.1</b>  | <b>no</b>  | <b>none</b>        | <b>insulin</b>                   | <b>20</b>         | <b>N/A</b>          | <b>9.6 (81.4)</b>  | <b>75.5</b>         | <b>no family members tested</b>      |
| <b>F474</b> | <b>P686</b> | <b>N/A</b>                   | <b>15</b>                   | <b>obese</b> | <b>yes</b> | <b>N/A</b>         | <b>N/A</b>                       | <b>7.5</b>        | <b>N/A</b>          | <b>N/A</b>         | <b>N/A</b>          | <b>multiple generations affected</b> |
| F474        | P688        | no diabetes                  | 37                          | N/A          | N/A        | N/A                | N/A                              | N/A               | N/A                 | N/A                | N/A                 | multiple generations affected        |
| <b>F508</b> | <b>P722</b> | <b>N/A</b>                   | <b>18</b>                   | <b>N/A</b>   | <b>N/A</b> | <b>N/A</b>         | <b>insulin</b>                   | <b>N/A</b>        | <b>N/A</b>          | <b>8.0 (63.9)</b>  | <b>N/A</b>          | <b>no family members tested</b>      |

Index patients are shown in bold. Age at diabetes: N/A—the patient has diabetes, but no information was received regarding the age of diagnosis; no diabetes - no information was given in the application form that the patient shows any signs of diabetes. dg—diagnosis; OAD—oral antidiabetic drug; IHD—Ischemic Heart Disease.

\* BMI data refers to the time of referral for genetic testing.

**Table S4.** Clinical data of patients having a mutation in other MODY-causing genes.

| Family ID   | Sample ID   | Age at Diagnosis of Diabetes | Age at Receiving Genetic dg | BMI*        | Obesity    | Complications                                                 | Therapy BEFORE dg      | FPG (0') (mmol/L) | PPG (120') (mmol/L) | HbA1c % (mmol/mol) | MODY Calculator % | Family Screening                     |
|-------------|-------------|------------------------------|-----------------------------|-------------|------------|---------------------------------------------------------------|------------------------|-------------------|---------------------|--------------------|-------------------|--------------------------------------|
| <b>F196</b> | <b>P331</b> | <b>32</b>                    | <b>39</b>                   | <b>20.3</b> | <b>no</b>  | <b>none</b>                                                   | <b>OAD - metformin</b> | <b>8.8</b>        | <b>N/A</b>          | <b>8.2 (66.1)</b>  | <b>35.8</b>       | <b>multiple generations affected</b> |
| F196        | P332        | 35                           | 67                          | 28.7        | no         | retinopathy, nephropathy, uraemia, PAD, proteinuria, IHD, CHF | insulin                | 6.9               | N/A                 | 5.8 (39.9)         | 4.6               | multiple generations affected        |
| F196        | P334        | 17                           | 42                          | 26.8        | no         | retinopathy                                                   | insulin                | 9.2               | N/A                 | 6.7 (49.7)         | 8.2               | multiple generations affected        |
| <b>F305</b> | <b>P469</b> | <b>15</b>                    | <b>45</b>                   | <b>30.7</b> | <b>yes</b> | <b>retinopathia, proteinuria</b>                              | <b>insulin</b>         | <b>N/A</b>        | <b>N/A</b>          | <b>11.0 (96.7)</b> | <b>58</b>         | <b>no family members tested</b>      |
| <b>F076</b> | <b>P150</b> | <b>N/A</b>                   | <b>N/A</b>                  | <b>N/A</b>  | <b>N/A</b> | <b>N/A</b>                                                    | <b>N/A</b>             | <b>N/A</b>        | <b>N/A</b>          | <b>N/A</b>         | <b>N/A</b>        | <b>no family members tested</b>      |

| Family ID   | Sample ID   | Age at Diagnosis of Diabetes | Age at Receiving Genetic dg | BMI*        | Obesity    | Complications                   | Therapy BEFORE dg          | FPG (0') (mmol/L) | PPG (120') (mmol/L) | HbA1c % (mmol/mol) | MODY Calculator % | Family Screening                             |
|-------------|-------------|------------------------------|-----------------------------|-------------|------------|---------------------------------|----------------------------|-------------------|---------------------|--------------------|-------------------|----------------------------------------------|
| <b>F091</b> | <b>P168</b> | <b>15</b>                    | <b>16</b>                   | <b>27.9</b> | <b>no</b>  | <b>renal cysts</b>              | <b>OAD - metformin</b>     | <b>N/A</b>        | <b>N/A</b>          | <b>8.7 (71.6)</b>  | <b>75.5</b>       | <b>siblings positive, parents not tested</b> |
| F091        | P169        | no diabetes                  | 19                          | N/A         | N/A        | N/A                             | N/A                        | N/A               | N/A                 | N/A                | N/A               | siblings positive, parents not tested        |
| <b>F172</b> | <b>P297</b> | <b>15</b>                    | <b>17</b>                   | <b>29.5</b> | <b>yes</b> | <b>N/A</b>                      | <b>diet</b>                | <b>6.1</b>        | <b>13.9</b>         | <b>6.7 (49.7)</b>  | <b>75.5</b>       | <b>no family members tested</b>              |
| <b>F372</b> | <b>P556</b> | <b>31</b>                    | <b>33</b>                   | <b>23.9</b> | <b>no</b>  | <b>proteinuria, renal cysts</b> | <b>insulin</b>             | <b>8.2</b>        | <b>N/A</b>          | <b>8.6 (70.5)</b>  | <b>21</b>         | <b>no family members tested</b>              |
| <b>F388</b> | <b>P585</b> | <b>27</b>                    | <b>38</b>                   | <b>N/A</b>  | <b>N/A</b> | <b>none</b>                     | <b>OAD - sulphonylurea</b> | <b>6.9</b>        | <b>11</b>           | <b>7.7 (60.7)</b>  | <b>N/A</b>        | <b>no family members tested</b>              |
| <b>F097</b> | <b>P178</b> | <b>26</b>                    | <b>42</b>                   | <b>22</b>   | <b>no</b>  | <b>none</b>                     | <b>insulin</b>             | <b>N/A</b>        | <b>N/A</b>          | <b>about 6</b>     | <b>49.4</b>       | <b>multiple generations affected</b>         |
| F097        | P179        | 10                           | 17                          | 19          | no         | none                            | insulin                    | N/A               | N/A                 | 8 - 9              | 75.5              | multiple generations affected                |
| <b>F192</b> | <b>P324</b> | <b>10</b>                    | <b>16</b>                   | <b>28</b>   | <b>yes</b> | <b>none</b>                     | <b>diet</b>                | <b>8.2</b>        | <b>13.3</b>         | <b>6.6 (48.6)</b>  | <b>75.5</b>       | <b>no family members tested</b>              |
| <b>F284</b> | <b>P448</b> | <b>5</b>                     | <b>8</b>                    | <b>N/A</b>  | <b>N/A</b> | <b>N/A</b>                      | <b>N/A</b>                 | <b>N/A</b>        | <b>N/A</b>          | <b>7.6 (59.6)</b>  | <b>N/A</b>        | <b>no family members tested</b>              |
| <b>F315</b> | <b>P483</b> | <b>13</b>                    | <b>16</b>                   | <b>18.4</b> | <b>no</b>  | <b>polyuria, polydipsia</b>     | <b>none</b>                | <b>6.7</b>        | <b>9.4</b>          | <b>6.6 (48.6)</b>  | <b>75.5</b>       | <b>multiple generations affected</b>         |
| F315        | P485        | 43                           | 44                          | 23.7        | no         | none                            | diet                       | 6 -7              | 7.9                 | 7.1 (54.1)         | N/A               | multiple generations affected                |

Index patients are shown in bold. Age at diabetes: N/A—the patient has diabetes, but no information was received regarding the age of diagnosis; no diabetes—no information was given in the application form that the patient shows any signs of diabetes. dg—diagnosis; OAD—oral antidiabetic drug; PAD—Peripheral Arterial Disease; IHD—Ischemic Heart Disease; CHF—Congestive Heart Failure. \* BMI data refers to the time of referral for genetic testing.
